# Supplementary material for: Acute stress promotes effort mobilization for safety-related goals
Source: Springer Nature journal article supplement (doi:10.1038/s44271-024-00103-7), 2024-06-01
Supplement: MOESM2 [file 44271_2024_103_MOESM2_ESM.pdf]

## Supplementary Materials

### Supplementary Figures

Supplementary Figure 1: No evidence for a stress-induced changes in rate of change in force applied

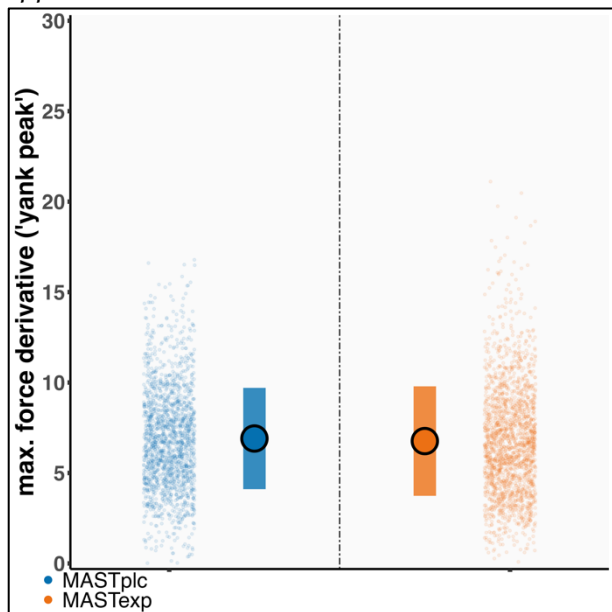

**Supplementary Fig. 1 Legend.** MAST<sub>EXP</sub> and MAST<sub>PLC</sub> participants did not significantly differ in the rate of change in force applied (yank peak, higher y-axis value = greater rate of change in force) following the decision to exert effort to avoid the threat-of-shock. Trial-level raw data (individual data points) and group-level summaries of individual-level averaged raw data (mean+error bars) are both shown. Error bars represent SD. n=80 participants.

Supplementary Tables

Supplementary Table 1: Experiment 1 Participant Characteristics

| Variable                  | MAST <sub>PLC</sub> | MAST <sub>EXP</sub> | Test Statistic     | p-value | Effect size        | Effect size 95% CI |
|---------------------------|---------------------|---------------------|--------------------|---------|--------------------|--------------------|
| Sex                       | 27 F/13 M           | 30 F/10 M           | 0.24 <sup>a</sup>  | 0.62    | 0.06 <sup>a</sup>  | 0.00 to 0.27       |
| Oral contraceptive        | 5 Y/22 N            | 5 Y/25 N            | 0.00 <sup>a</sup>  | >0.999  | 0.06 <sup>a</sup>  | 0.00 to <0.01      |
| Luteal Phase <sup>c</sup> | 12 Y/7 N            | 9 Y/12 N            | 0.93 <sup>a</sup>  | 0.33    | 0.15 <sup>a</sup>  | 0.00 to 0.46       |
| Age                       | 21.10 (2.64)        | 21.93 (2.70)        | -1.38 <sup>b</sup> | 0.17    | -0.31 <sup>b</sup> | -0.78 to 0.11      |
| BMI                       | 21.63 (2.06)        | 22.26 (2.55)        | -1.21 <sup>b</sup> | 0.23    | -0.27 <sup>b</sup> | -0.70 to 0.17      |
| PSS (sum)                 | 31.42 (3.64)        | 31.20 (3.16)        | 0.29 <sup>b</sup>  | 0.77    | 0.07 <sup>b</sup>  | -0.38 to 0.54      |
| BIS (mean)                | 2.07 (0.26)         | 2.14 (0.24)         | -1.20 <sup>b</sup> | 0.24    | -0.27 <sup>b</sup> | -0.71 to 0.21      |
| BAS Drive (mean)          | 2.29 (0.58)         | 2.27 (0.44)         | 0.22 <sup>b</sup>  | 0.83    | 0.05 <sup>b</sup>  | -0.41 to 0.49      |
| BAS Fun Seeking (mean)    | 1.98 (0.54)         | 2.12 (0.59)         | -1.14 <sup>b</sup> | 0.26    | -0.26 <sup>b</sup> | -0.73 to 0.17      |
| BAS Reward Resp. (mean)   | 1.60 (0.38)         | 1.59 (0.39)         | 0.12 <sup>b</sup>  | 0.91    | 0.03 <sup>b</sup>  | -0.42 to 0.49      |
| FPQ Minor Pain            | 20.73 (5.99)        | 21.20 (6.10)        | -0.35 <sup>b</sup> | 0.73    | -0.08 <sup>b</sup> | -0.51 to 0.35      |
| FPQ Severe Pain           | 38.73 (5.15)        | 39.58 (4.65)        | -0.78 <sup>b</sup> | 0.44    | -0.17 <sup>b</sup> | -0.60 to 0.28      |
| FPQ Medical Pain          | 28.15 (7.60)        | 29.27 (7.38)        | -0.67 <sup>b</sup> | 0.50    | -0.15 <sup>b</sup> | -0.61 to 0.28      |
| PCS Magnification         | 5.03 (2.69)         | 5.38 (2.54)         | -0.60 <sup>b</sup> | 0.55    | -0.13 <sup>b</sup> | -0.57 to 0.35      |
| PCS Rumination            | 8.45 (3.50)         | 8.40 (3.63)         | 0.06 <sup>b</sup>  | 0.95    | 0.01 <sup>b</sup>  | -0.42 to 0.46      |
| PCS Helplessness          | 8.75 (3.50)         | 8.97 (4.49)         | -0.25 <sup>b</sup> | 0.80    | -0.06 <sup>b</sup> | -0.46 to 0.44      |
| MEI Mental Energy         | 31.73 (8.02)        | 29.42 (7.81)        | 1.30 <sup>b</sup>  | 0.20    | 0.29 <sup>b</sup>  | -0.15 to 0.76      |
| MEI Social Motivation     | 35.42 (3.82)        | 33.60 (4.29)        | 2.01 <sup>b</sup>  | 0.05    | 0.45 <sup>b</sup>  | 0.00 to 0.88       |
| MEI Physical Energy       | 26.05 (3.86)        | 24.55 (3.19)        | 1.89 <sup>b</sup>  | 0.06    | 0.42 <sup>b</sup>  | -0.03 to 0.86      |
| MGF                       | 1.37 (0.23)         | 1.30 (0.18)         | 1.50 <sup>b</sup>  | 0.14    | 0.33 <sup>b</sup>  | -0.10 to 0.76      |
| Shock calibration         | 5.21 (2.52)         | 4.40 (1.99)         | 1.60 <sup>b</sup>  | 0.11    | 0.36 <sup>b</sup>  | -0.11 to 0.82      |

**Supplementary Table 1.** <sup>a</sup>= $\chi^2$ /Cramer's *V*, <sup>b</sup>=t-statistic/Cohen's *d*, <sup>c</sup>=all participants with a regular menstrual cycle were asked if their next period was expected within the next 10 days. BMI = Body Mass Index, PSS = Perceived Stress Scale (10-item version)<sup>1</sup>, BIS = Behavioural Inhibition Scale<sup>2</sup>, BAS = Behavioural Activation Scale<sup>2</sup>, FPQ = Fear of Pain Questionnaire (version 3/30 items)<sup>3</sup>, PCS = Pain Catastrophising Scale (13-item version)<sup>4</sup>, MEI = Motivation and Energy Inventory (26-item version)<sup>5</sup>, MGF = maximal grip force.

Supplementary Table 2: Experiment 2 Participant Characteristics

| Variable                  | MAST <sub>PLC</sub> | MAST <sub>EXP</sub> | Test Statistic     | p-value | Effect size        | Effect size 95% CI |
|---------------------------|---------------------|---------------------|--------------------|---------|--------------------|--------------------|
| Sex                       | 32 F/10 M           | 31 F/11 M           | 0.00 <sup>a</sup>  | >0.999  | <0.01 <sup>a</sup> | 0.00 to <0.01      |
| Oral contraceptive        | 9 Y/23 N            | 11 Y/20 N           | 0.13 <sup>a</sup>  | 0.72    | 0.04 <sup>a</sup>  | 0.00 to 0.29       |
| Luteal Phase <sup>c</sup> | 10 Y/12 N           | 12 Y/13 N           | 0.00 <sup>a</sup>  | >0.999  | <0.01 <sup>a</sup> | 0.00 to <0.01      |
| Age                       | 23.74 (3.09)        | 22.14 (3.19)        | 2.33 <sup>b</sup>  | 0.02    | 0.51 <sup>b</sup>  | 0.07 to 1.05       |
| BMI                       | 22.07 (2.33)        | 21.20 (2.41)        | 1.67 <sup>b</sup>  | 0.10    | 0.37 <sup>b</sup>  | -0.08 to 0.83      |
| SHAPS (sum)               | 34.48 (4.71)        | 34.60 (2.68)        | -0.14 <sup>b</sup> | 0.89    | -0.03 <sup>b</sup> | -0.44 to 0.44      |
| PSS (sum)                 | 31.95 (3.41)        | 30.67 (2.71)        | 1.91 <sup>b</sup>  | 0.06    | 0.42 <sup>b</sup>  | -0.02 to 0.87      |
| BIS (mean)                | 2.10 (0.34)         | 2.09 (0.26)         | 0.12 <sup>b</sup>  | 0.91    | 0.03 <sup>b</sup>  | -0.44 to 0.44      |
| BAS Drive (Mean)          | 2.26 (0.46)         | 2.33 (0.50)         | -0.62 <sup>b</sup> | 0.54    | -0.14 <sup>b</sup> | -0.60 to .31       |
| BAS Fun Seeking (mean)    | 1.94 (0.49)         | 2.01 (0.44)         | -0.64 <sup>b</sup> | 0.52    | -0.14 <sup>b</sup> | -0.56 to 0.28      |
| BAS Reward Resp. (mean)   | 1.54 (0.36)         | 1.47 (0.31)         | 0.98 <sup>b</sup>  | 0.33    | 0.21 <sup>b</sup>  | -0.22 to 0.64      |
| MGF                       | 1.25 (0.21)         | 1.25 (0.16)         | -0.14              | 0.89    | -0.03 <sup>b</sup> | -0.51 to 0.37      |

**Supplementary Table 2.** <sup>a</sup>= $\chi^2$ /Cramer's *V*, <sup>b</sup>=t-statistic/Cohen's *d*, <sup>c</sup>=all people with a regular menstrual cycle were asked if their next period was expected within the next 10 days. BMI = Body Mass Index, SHAPS = Snaith-Hamilton Pleasure Scale<sup>6</sup>, PSS = Perceived Stress Scale<sup>1</sup>, BIS = Behavioural Inhibition Scale<sup>2</sup>, BAS = Behavioural Activation Scale<sup>2</sup>, MGF = maximal grip force.

Supplementary Table 3: Complete output for key main text regression models

| <b>Experiment 1</b>                                                                                                                                                                      |          |                   |                |                |
|------------------------------------------------------------------------------------------------------------------------------------------------------------------------------------------|----------|-------------------|----------------|----------------|
| Main effect of threat-of-shock, effort cost, and time on choice (accept effort ~ effort_lm + threat_lm + block + (1 + effort_lm + threat_lm + block   participant number))               |          |                   |                |                |
|                                                                                                                                                                                          | <b>B</b> | <b>Std. Error</b> | <b>z-value</b> | <b>p-value</b> |
| <b>(Intercept)</b>                                                                                                                                                                       | 1.68     | 0.25              | 7.00           | <0.001         |
| <b>effort_lm</b>                                                                                                                                                                         | -1.47    | 0.12              | -11.82         | <0.001         |
| <b>threat_lm</b>                                                                                                                                                                         | 2.21     | 0.14              | 16.32          | <0.001         |
| <b>block</b>                                                                                                                                                                             | -0.09    | 0.06              | -1.62          | 0.11           |
| Interaction between threat-of-shock, effort cost, and condition on choice (accept effort ~ condition*effort_lm*threat_lm + (1 + effort_lm + threat_lm + condition   participant number)) |          |                   |                |                |
|                                                                                                                                                                                          | <b>B</b> | <b>Std. Error</b> | <b>z-value</b> | <b>p-value</b> |
| <b>(Intercept)</b>                                                                                                                                                                       | 1.02     | 0.32              | 3.17           | 0.002          |
| <b>condition</b>                                                                                                                                                                         | 0.93     | 0.50              | 1.86           | 0.06           |
| <b>effort_lm</b>                                                                                                                                                                         | -1.43    | 0.17              | -8.52          | <0.001         |
| <b>threat_lm</b>                                                                                                                                                                         | 2.09     | 0.17              | 12.32          | <0.001         |
| <b>condition:effort_lm</b>                                                                                                                                                               | -0.12    | 0.24              | -0.49          | 0.62           |
| <b>condition:threat_lm</b>                                                                                                                                                               | 0.17     | 0.24              | 0.72           | 0.47           |
| <b>effort_lm:threat_lm</b>                                                                                                                                                               | -0.10    | 0.06              | -1.66          | 0.10           |
| <b>condition:effort_lm:threat_lm</b>                                                                                                                                                     | -0.21    | 0.10              | -2.18          | 0.029          |
| <b>Experiment 2</b>                                                                                                                                                                      |          |                   |                |                |
| Main effect of reward, effort cost, and time on choice (accept effort ~ effort_lm + reward_lm + block + (1 + effort_lm + reward_lm + block   participant number))                        |          |                   |                |                |
|                                                                                                                                                                                          | <b>B</b> | <b>Std. Error</b> | <b>z-value</b> | <b>p-value</b> |
| <b>(Intercept)</b>                                                                                                                                                                       | 5.91     | 0.47              | 12.50          | <0.001         |
| <b>effort_lm</b>                                                                                                                                                                         | -2.18    | 0.18              | -12.26         | <0.001         |
| <b>reward_lm</b>                                                                                                                                                                         | 3.66     | 0.26              | 13.56          | <0.001         |
| <b>block</b>                                                                                                                                                                             | -0.05    | 0.08              | -0.68          | 0.50           |
| Interaction between reward, effort cost, and condition on choice (accept effort ~ condition*effort_lm*reward_lm + (1 + effort_lm + reward_lm + condition   participant number))          |          |                   |                |                |
|                                                                                                                                                                                          | <b>B</b> | <b>Std. Error</b> | <b>z-value</b> | <b>p-value</b> |
| <b>(Intercept)</b>                                                                                                                                                                       | 6.02     | 0.60              | 9.99           | <0.001         |
| <b>condition</b>                                                                                                                                                                         | -0.39    | 0.91              | -0.43          | 0.67           |
| <b>effort_lm</b>                                                                                                                                                                         | -2.45    | 0.31              | -7.88          | <0.001         |
| <b>reward_lm</b>                                                                                                                                                                         | 3.68     | 0.38              | 9.65           | <0.001         |
| <b>condition:effort_lm</b>                                                                                                                                                               | -0.01    | 0.41              | -0.03          | 0.98           |
| <b>condition:reward_lm</b>                                                                                                                                                               | 0.12     | 0.53              | 0.22           | 0.83           |
| <b>effort_lm:reward_lm</b>                                                                                                                                                               | -0.43    | 0.16              | -2.71          | 0.01           |
| <b>condition:effort_lm:reward_lm</b>                                                                                                                                                     | 0.07     | 0.20              | 0.33           | 0.74           |
| <b>Experiment 1 versus Experiment 2</b>                                                                                                                                                  |          |                   |                |                |
| Interaction between experiment and condition on choice (accept effort ~ experiment*condition + effort_lm + (1 + effort_lm + condition + study   pp_num))                                 |          |                   |                |                |
|                                                                                                                                                                                          | <b>B</b> | <b>Std. Error</b> | <b>z-value</b> | <b>p-value</b> |
| <b>(Intercept)</b>                                                                                                                                                                       | 2.02     | 0.24              | 8.52           | <0.001         |
| <b>experiment</b>                                                                                                                                                                        | -0.93    | 0.29              | -3.25          | 0.001          |
| <b>condition</b>                                                                                                                                                                         | 0.45     | 0.35              | 1.30           | 0.19           |
| <b>effort_lm</b>                                                                                                                                                                         | -0.94    | 0.06              | -15.65         | <0.001         |
| <b>experiment:condition</b>                                                                                                                                                              | -1.12    | 0.43              | -2.62          | 0.009          |

### Supplementary References

1. Cohen, S. Perceived stress in a probability sample of the United States. in *The social psychology of health* 31–67 (Sage Publications, Inc, Thousand Oaks, CA, US, 1988).
2. Carver, C. S. & White, T. L. Behavioral inhibition, behavioral activation, and affective responses to impending reward and punishment: The BIS/BAS Scales. *J. Pers. Soc. Psychol.* **67**, 319–333 (1994). <https://doi.org/10.1037/0022-3514.67.2.319>
3. McNeil, D. W. & Rainwater, A. J. Development of the Fear of Pain Questionnaire-III. *J. Behav. Med.* **21**, 389–410 (1998). <https://doi.org/10.1023/a:1018782831217>
4. Sullivan, M. J. L., Bishop, S. R. & Pivik, J. The Pain Catastrophizing Scale: Development and validation. *Psychol. Assess.* **7**, 524–532 (1995). <https://doi.org/10.1037/1040-3590.7.4.524>
5. Fehnel, S. E., Bann, C. M., Hogue, S. L., Kwong, W. J. & Mahajan, S. S. The development and psychometric evaluation of the motivation and energy inventory (MEI). *Qual. Life Res.* **13**, 1321–1336 (2004). <https://doi.org/10.1023/b:qure.0000037502.64077.4d>
6. Snaith, R. P. *et al.* A Scale for the Assessment of Hedonic Tone the Snaith–Hamilton Pleasure Scale. *Br. J. Psychiatry* **167**, 99–103 (1995). <https://doi.org/10.1192/bjp.167.1.99>
